# Supplementary material for: Multichannel Analysis of Surface Waves (MASW) to Estimate the Shear Wave Velocity for Engineering Characterization of Soils at Hawassa Town, Southern Ethiopia
Source: Hindawi journal article supplement (doi:10.1155/2022/7588306), 2022-12-19
Supplement: f1 [file 7588306.f1.docx]

Title: Multichannel Analysis of Surface Waves (MASW) to estimate the shear wave velocityfor engineering characterization of soils at Hawassa town, Southern Ethiopia **(ID No. 7588306)**

**Alemayehu Ayele13, Kifle Woldearegay2 and Matebie Meten1**

1Department of Geology, College of Applied Sciences, Addis Ababa Science and Technology University, Addis Ababa, Ethiopia; P.O.Box.16417; Email: [alex98geo@gmail.com](mailto:alex98geo@gmail.com)

2 School of Earth Sciences, Mekelle University, Mekelle, Ethiopia; P.O.Box. 231

3Department of Geology, College of Natural and Computational Science, Wachemo University, Hosanna, Ethiopia; P.O.Box. 667

**Supplementary Materials**

Table S1: The location, number of bore hole data and aquifer depth or groundwater level data used in the Hawassa region, Southern Ethiopia

| **Easting** | **Northing** | **Aquifer depth (m)** |
| --- | --- | --- |
| 443750 | 780229 | 11.2 |
| 443980 | 780192 | 22.35 |
| 440728 | 776754 | 12.45 |
| 444240 | 779070 | 26.64 |
| 444133 | 779461 | 22.6 |
| 444865 | 779285 | 25.3 |
| 444885 | 779439 | 25.39 |
| 444352 | 779812 | 27.5 |
| 444778 | 778872 | 30.17 |
| 444526 | 779294 | 24.8 |
| 445205 | 779258 | 28.6 |
| 444088 | 779732 | 17.72 |
| 443285 | 781225 | 16.4 |
| 441792 | 778962 | 7.6 |
| 442721 | 778699 | 28 |
| 441096 | 776348 | 13.54 |
| 443743 | 780228 | 22.3 |
| 443455 | 782563 | 13.72 |
| 444756 | 776926 | 45.47 |
| 445387 | 777593 | 46.13 |
| 441692 | 779207 | 12.02 |
| 442888 | 779270 | 25.6 |
| 442971 | 780703 | 18.5 |
| 441936 | 778609 | 20.2 |
| 440372 | 778881 | 5 |
| 443288 | 778688 | 27.72 |
| 443745 | 780233 | 22 |
| 443296 | 778694 | 7 |
| 442382 | 778735 | 26.7 |
| 444167 | 778737 | 29.66 |
| 444224 | 777249 | 56 |
| 443006 | 782569 | 15 |
| 443279 | 782844 | 7.5 |
| 441044 | 779105 | 15 |
| 441210 | 779191 | 6 |
| 441264 | 779202 | 6.2 |
| 441415 | 778986 | 8.65 |
| 443558 | 779418 | 23 |
| 443590 | 779645 | 20 |
| 443431 | 779558 | 23 |
| 443706 | 779476 | 22 |
| 442744 | 780669 | 14.4 |
| 444260 | 780839 | 15 |
| 440623 | 778350 | 7.8 |
| 440487 | 778351 | 7 |
| 442299 | 779538 | 24 |


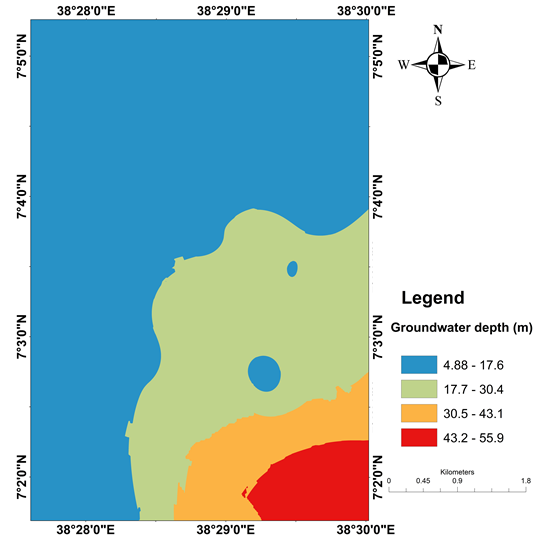


Figure S1: Groundwater level map that show the aquifer depth from 4.88m to 55.9m of Hawassa town, Southern Ethiopia

Table S2: The Vs (m/s), Vp (m/s) and thickness (m) data in the study area of Hawassa town up to a depth of 30m

| **Thhickess (m)** | **MASW1Vs (m/s)** | **MASW 1Vp** | **MASW2Vs** | **MASW2Vp** | **MASW3Vs** | **MASW3Vp** | **MASW4Vs** | **MASW4Vp** | **MASW5Vs** | **MASW5Vp** |
| --- | --- | --- | --- | --- | --- | --- | --- | --- | --- | --- |
| 1.4 | 197 | 1508.67 | 327 | 1652.97 | 228 | 1543.08 | 223 | 1537.53 | 300 | 1623 |
| 3.1 | 191 | 1502.01 | 322 | 1647.42 | 230 | 1545.3 | 226 | 1540.86 | 299 | 1621.89 |
| 4.9 | 168 | 1476.48 | 269 | 1588.59 | 233 | 1548.63 | 241 | 1557.51 | 291 | 1613.01 |
| 7 | 231 | 1546.41 | 236 | 1551.96 | 247 | 1564.17 | 280 | 1600.8 | 291 | 1613.01 |
| 9.3 | 352 | 1680.72 | 235 | 1550.85 | 258 | 1576.38 | 296 | 1618.56 | 306 | 1629.66 |
| 11.9 | 449 | 1788.39 | 276 | 1596.36 | 275 | 1595.25 | 273 | 1593.03 | 337 | 1664.07 |
| 14.6 | 501 | 1846.11 | 365 | 1695.15 | 307 | 1630.77 | 267 | 1586.37 | 378 | 1709.58 |
| 17.6 | 534 | 1882.74 | 408 | 1742.88 | 348 | 1676.28 | 268 | 1587.48 | 425 | 1761.75 |
| 20.8 | 542 | 1891.62 | 452 | 1791.72 | 390 | 1722.9 | 284 | 1605.24 | 444 | 1782.84 |
| 24.2 | 528 | 1876.08 | 473 | 1815.03 | 406 | 1740.66 | 278 | 1598.58 | 452 | 1791.72 |
| 27.8 | 518 | 1864.98 | 467 | 1808.37 | 363 | 1692.93 | 279 | 1599.69 | 449 | 1788.39 |
| 30 | 510 | 1856.1 | 456 | 1796.16 | 294 | 1616.34 | 283 | 1604.13 | 443 | 1781.73 |


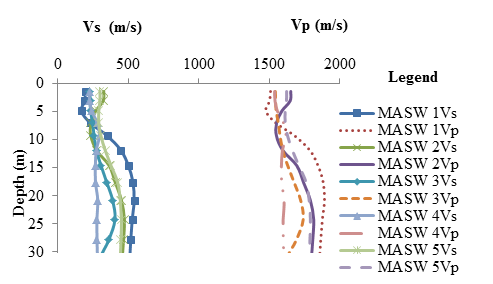


Figure S2: The depth wise plots of Vs and Vp for the typical sites of MASW1, MASW 2 MASW 3, MASW 4 and MASW 5 in the Hawassa town

Table S3: 242 data point sets of Vs, SPT-N and N60 used in this study for the plotting of empirical correlation between Vs versus SPT-N values and N60 in the Hawassa town

| **S.No** | **VS (m/s)** | **SPT-N values** | **N60** |
| --- | --- | --- | --- |
| 1 | 168 | 14 | 11.08333 |
| 2 | 231 | 20 | 15.83333 |
| 3 | 310 | 30 | 23.75` |
| 4 | 449 | 50 | 39.58333 |
| 5 | 300 | 30 | 23.75 |
| 6 | 220 | 14 | 11.08333 |
| 7 | 238 | 21 | 16.625 |
| 8 | 168 | 10 | 7.916667 |
| 9 | 231 | 14 | 11.08333 |
| 10 | 352 | 30 | 23.75 |
| 11 | 400 | 50 | 39.58333 |
| 12 | 293 | 30 | 23.75 |
| 13 | 230 | 15 | 11.875 |
| 14 | 250 | 20 | 15.83333 |
| 15 | 230 | 12 | 9.5 |
| 16 | 228 | 4 | 3.166667 |
| 17 | 247 | 25 | 19.79167 |
| 18 | 275 | 30 | 23.75 |
| 19 | 348 | 33 | 26.125 |
| 20 | 390 | 40 | 31.66667 |
| 21 | 230 | 14 | 11.08333 |
| 22 | 228 | 8 | 6.333333 |
| 23 | 247 | 20 | 15.83333 |
| 24 | 275 | 26 | 20.58333 |
| 25 | 348 | 24 | 19 |
| 26 | 380 | 28 | 22.16667 |
| 27 | 385 | 32 | 25.33333 |
| 28 | 390 | 33 | 26.125 |
| 29 | 395 | 40 | 31.66667 |
| 30 | 230 | 16 | 12.66667 |
| 31 | 228 | 6 | 4.75 |
| 32 | 247 | 13 | 10.29167 |
| 33 | 275 | 15 | 11.875 |
| 34 | 348 | 16 | 12.66667 |
| 35 | 365 | 32 | 25.33333 |
| 36 | 370 | 36 | 28.5 |
| 37 | 390 | 38 | 30.08333 |
| 38 | 395 | 40 | 31.66667 |
| 39 | 223 | 12 | 9.5 |
| 40 | 226 | 13 | 10.29167 |
| 41 | 241 | 9 | 7.125 |
| 42 | 241 | 36 | 28.5 |
| 43 | 296 | 11 | 8.708333 |
| 44 | 273 | 14 | 11.08333 |
| 45 | 267 | 24 | 19 |
| 46 | 268 | 35 | 27.70833 |
| 47 | 284 | 21 | 16.625 |
| 48 | 278 | 25 | 19.79167 |
| 49 | 279 | 31 | 24.54167 |
| 50 | 283 | 29 | 22.95833 |
| 51 | 197 | 8 | 6.333333 |
| 52 | 191 | 6 | 4.75 |
| 53 | 168 | 5 | 3.958333 |
| 54 | 231 | 28 | 22.16667 |
| 55 | 352 | 21 | 16.625 |
| 56 | 360 | 28 | 22.16667 |
| 57 | 370 | 18 | 14.25 |
| 58 | 390 | 38 | 30.08333 |
| 59 | 395 | 40 | 31.66667 |
| 60 | 399 | 45 | 35.625 |
| 61 | 400 | 50 | 39.58333 |
| 62 | 395 | 40 | 31.66667 |
| 63 | 223 | 9 | 7.125 |
| 64 | 226 | 12 | 9.5 |
| 65 | 241 | 22 | 17.41667 |
| 66 | 273 | 17 | 13.45833 |
| 67 | 267 | 21 | 16.625 |
| 68 | 284 | 32 | 25.33333 |
| 69 | 278 | 32 | 25.33333 |
| 70 | 279 | 36 | 28.5 |
| 71 | 291 | 40 | 31.66667 |
| 72 | 284 | 9 | 7.125 |
| 73 | 278 | 6 | 4.75 |
| 74 | 279 | 5 | 3.958333 |
| 75 | 291 | 7 | 5.541667 |
| 76 | 300 | 23 | 18.20833 |
| 77 | 310 | 28 | 22.16667 |
| 78 | 315 | 28 | 22.16667 |
| 79 | 390 | 45 | 35.625 |
| 80 | 400 | 50 | 39.58333 |
| 81 | 340 | 40 | 31.66667 |
| 82 | 320 | 36 | 28.5 |
| 83 | 350 | 40 | 31.66667 |
| 84 | 210 | 15 | 11.875 |
| 85 | 250 | 20 | 15.83333 |
| 86 | 280 | 28 | 22.16667 |
| 87 | 220 | 13 | 10.29167 |
| 88 | 260 | 24 | 19 |
| 89 | 279 | 36 | 28.5 |
| 90 | 290 | 37 | 29.29167 |
| 91 | 340 | 38 | 30.08333 |
| 92 | 360 | 41 | 32.45833 |
| 93 | 200 | 4 | 3.166667 |
| 94 | 210 | 6 | 4.75 |
| 95 | 220 | 9 | 7.125 |
| 96 | 230 | 12 | 9.5 |
| 97 | 240 | 18 | 14.25 |
| 98 | 245 | 24 | 19 |
| 99 | 246 | 24 | 19 |
| 100 | 250 | 30 | 23.75 |
| 101 | 270 | 34 | 26.91667 |
| 102 | 290 | 37 | 29.29167 |
| 103 | 300 | 45 | 35.625 |
| 104 | 350 | 50 | 39.58333 |
| 105 | 230 | 8 | 6.333333 |
| 106 | 260 | 13 | 10.29167 |
| 107 | 270 | 14 | 11.08333 |
| 108 | 300 | 15 | 11.875 |
| 109 | 309 | 18 | 14.25 |
| 110 | 320 | 22 | 17.41667 |
| 111 | 330 | 26 | 20.58333 |
| 112 | 380 | 38 | 30.08333 |
| 113 | 390 | 45 | 35.625 |
| 114 | 345 | 30 | 23.75 |
| 115 | 260 | 14 | 11.08333 |
| 116 | 370 | 32 | 25.33333 |
| 117 | 340 | 30 | 23.75 |
| 118 | 440 | 50 | 39.58333 |
| 119 | 440 | 50 | 39.58333 |
| 120 | 435 | 50 | 39.58333 |
| 121 | 240 | 11 | 8.708333 |
| 122 | 220 | 9 | 7.125 |
| 123 | 320 | 35 | 27.70833 |
| 124 | 250 | 18 | 14.25 |
| 125 | 310 | 30 | 23.75 |
| 126 | 310 | 30 | 23.75 |
| 127 | 340 | 40 | 31.66667 |
| 128 | 260 | 14 | 11.08333 |
| 129 | 220 | 11 | 8.708333 |
| 130 | 310 | 26 | 20.58333 |
| 131 | 330 | 33 | 26.125 |
| 132 | 315 | 30 | 23.75 |
| 133 | 345 | 40 | 31.66667 |
| 134 | 335 | 35 | 27.70833 |
| 135 | 315 | 18 | 14.25 |
| 136 | 290 | 12 | 9.5 |
| 137 | 320 | 18 | 14.25 |
| 138 | 290 | 20 | 15.83333 |
| 139 | 300 | 30 | 23.75 |
| 140 | 295 | 25 | 19.79167 |
| 141 | 250 | 16 | 12.66667 |
| 142 | 191 | 14 | 11.08333 |
| 143 | 225 | 20 | 15.83333 |
| 144 | 330 | 30 | 23.75 |
| 145 | 225 | 18 | 14.25 |
| 146 | 270 | 30 | 23.75 |
| 147 | 240 | 14 | 11.08333 |
| 148 | 270 | 30 | 23.75 |
| 149 | 230 | 24 | 19 |
| 150 | 210 | 19 | 15.04167 |
| 151 | 340 | 30 | 23.75 |
| 152 | 270 | 30 | 23.75 |
| 153 | 220 | 21 | 16.625 |
| 154 | 221 | 21 | 16.625 |
| 155 | 210 | 16 | 12.66667 |
| 156 | 200 | 13 | 10.29167 |
| 157 | 280 | 50 | 39.58333 |
| 158 | 280 | 50 | 39.58333 |
| 159 | 215 | 16 | 12.66667 |
| 160 | 230 | 28 | 22.16667 |
| 161 | 223 | 24 | 19 |
| 162 | 230 | 27 | 21.375 |
| 163 | 250 | 30 | 23.75 |
| 164 | 241 | 24 | 19 |
| 165 | 290 | 30 | 23.75 |
| 166 | 290 | 30 | 23.75 |
| 167 | 290 | 30 | 23.75 |
| 168 | 215 | 21 | 16.625 |
| 169 | 284 | 19 | 15.04167 |
| 170 | 296 | 30 | 23.75 |
| 171 | 250 | 27 | 21.375 |
| 172 | 230 | 19 | 15.04167 |
| 173 | 220 | 18 | 14.25 |
| 174 | 210 | 13 | 10.29167 |
| 175 | 265 | 30 | 23.75 |
| 176 | 265 | 30 | 23.75 |
| 177 | 230 | 24 | 19 |
| 178 | 190 | 14 | 11.08333 |
| 179 | 250 | 27 | 21.375 |
| 180 | 200 | 16 | 12.66667 |
| 181 | 260 | 30 | 23.75 |
| 182 | 257 | 25 | 19.79167 |
| 183 | 228 | 24 | 19 |
| 184 | 225 | 23 | 18.20833 |
| 185 | 290 | 20 | 15.83333 |
| 186 | 290 | 20 | 15.83333 |
| 187 | 280 | 17 | 13.45833 |
| 188 | 185 | 13 | 10.29167 |
| 189 | 250 | 23 | 18.20833 |
| 190 | 295 | 20 | 15.83333 |
| 191 | 300 | 30 | 23.75 |
| 192 | 300 | 30 | 23.75 |
| 193 | 298 | 28 | 22.16667 |
| 194 | 240 | 22 | 17.41667 |
| 195 | 245 | 20 | 15.83333 |
| 196 | 250 | 23 | 18.20833 |
| 197 | 220 | 17 | 13.45833 |
| 198 | 280 | 27 | 21.375 |
| 199 | 300 | 30 | 23.75 |
| 200 | 300 | 30 | 23.75 |
| 201 | 200 | 13 | 10.29167 |
| 202 | 205 | 16 | 12.66667 |
| 203 | 305 | 30 | 23.75 |
| 204 | 289 | 24 | 19 |
| 205 | 270 | 17 | 13.45833 |
| 206 | 285 | 19 | 15.04167 |
| 207 | 280 | 23 | 18.20833 |
| 208 | 312 | 30 | 23.75 |
| 209 | 312 | 30 | 23.75 |
| 210 | 260 | 15 | 11.875 |
| 211 | 265 | 16 | 12.66667 |
| 212 | 270 | 20 | 15.83333 |
| 213 | 315 | 30 | 23.75 |
| 214 | 315 | 30 | 23.75 |
| 215 | 315 | 30 | 23.75 |
| 216 | 228 | 14 | 11.08333 |
| 217 | 197 | 8 | 6.333333 |
| 218 | 290 | 20 | 15.83333 |
| 219 | 290 | 20 | 15.83333 |
| 220 | 199 | 10 | 7.916667 |
| 221 | 230 | 15 | 11.875 |
| 222 | 225 | 12 | 9.5 |
| 223 | 200 | 9 | 7.125 |
| 224 | 230 | 15 | 11.875 |
| 225 | 245 | 20 | 15.83333 |
| 226 | 243 | 20 | 15.83333 |
| 227 | 262 | 23 | 18.20833 |
| 228 | 350 | 45 | 35.625 |
| 229 | 270 | 26 | 20.58333 |
| 230 | 300 | 30 | 23.75 |
| 231 | 380 | 50 | 39.58333 |
| 232 | 191 | 5 | 3.958333 |
| 233 | 197 | 12 | 9.5 |
| 234 | 195 | 11 | 8.708333 |
| 235 | 340 | 49 | 38.79167 |
| 236 | 295 | 27 | 21.375 |
| 237 | 220 | 17 | 13.45833 |
| 238 | 220 | 17 | 13.45833 |
| 239 | 230 | 22 | 17.41667 |
| 240 | 201 | 13 | 10.29167 |
| 241 | 198 | 12 | 9.5 |
| 242 | 230 | 19 | 15.04167 |

Table S4: The Vsmeas, SPT-N, Vspred and Cd values used for the validation in Hawassa town, Southern Ethiopia

| **Vsmeas (m/s)** | **SPT-N** | **Vspred** | **Vsmeas-Vspred** | **Cd** |
| --- | --- | --- | --- | --- |
| 168 | 14 | 240.7762745 | -72.77627448 | -5.19831 |
| 231 | 20 | 266.0640755 | -35.06407546 | -1.7532 |
| 310 | 30 | 298.0518293 | 11.94817069 | 0.398272 |
| 449 | 50 | 343.8819981 | 105.1180019 | 2.10236 |
| 300 | 30 | 298.0518293 | 1.948170694 | 0.064939 |
| 220 | 14 | 240.7762745 | -20.77627448 | -1.48402 |
| 238 | 21 | 269.7237834 | -31.72378341 | -1.51066 |
| 168 | 10 | 219.1279826 | -51.12798257 | -5.1128 |
| 231 | 14 | 240.7762745 | -9.776274476 | -0.69831 |
| 352 | 30 | 298.0518293 | 53.94817069 | 1.798272 |
| 400 | 50 | 343.8819981 | 56.11800185 | 1.12236 |
| 293 | 30 | 298.0518293 | -5.051829306 | -0.16839 |
| 230 | 15 | 245.4728093 | -15.4728093 | -1.03152 |
| 250 | 20 | 266.0640755 | -16.06407546 | -0.8032 |
| 230 | 12 | 230.6049309 | -0.60493085 | -0.05041 |
| 228 | 4 | 169.54096 | 58.45904001 | 14.61476 |
| 247 | 25 | 283.2181247 | -36.21812467 | -1.44872 |
| 275 | 30 | 298.0518293 | -23.05182931 | -0.76839 |
| 348 | 33 | 306.1129788 | 41.8870212 | 1.269304 |
| 390 | 40 | 323.0536393 | 66.94636066 | 1.673659 |
| 230 | 14 | 240.7762745 | -10.77627448 | -0.76973 |
| 228 | 8 | 205.8557663 | 22.14423369 | 2.768029 |
| 247 | 20 | 266.0640755 | -19.06407546 | -0.9532 |
| 275 | 26 | 286.3455101 | -11.34551012 | -0.43637 |
| 348 | 24 | 279.9993274 | 68.00067265 | 2.833361 |
| 380 | 28 | 292.3493208 | 87.65067925 | 3.130381 |
| 385 | 32 | 303.4868195 | 81.51318052 | 2.547287 |
| 390 | 33 | 306.1129788 | 83.8870212 | 2.542031 |
| 395 | 40 | 323.0536393 | 71.94636066 | 1.798659 |
| 230 | 16 | 249.9490184 | -19.94901838 | -1.24681 |
| 228 | 6 | 189.9241496 | 38.07585041 | 6.345975 |
| 247 | 13 | 235.83159 | 11.16841003 | 0.859108 |
| 275 | 15 | 245.4728093 | 29.5271907 | 1.968479 |
| 348 | 16 | 249.9490184 | 98.05098162 | 6.128186 |
| 365 | 32 | 303.4868195 | 61.51318052 | 1.922287 |
| 370 | 36 | 313.6624574 | 56.33754264 | 1.564932 |
| 390 | 38 | 318.4470627 | 71.55293728 | 1.882972 |
| 395 | 40 | 323.0536393 | 71.94636066 | 1.798659 |
| 223 | 12 | 230.6049309 | -7.60493085 | -0.63374 |
| 226 | 13 | 235.83159 | -9.831589966 | -0.75628 |
| 241 | 9 | 212.7579235 | 28.2420765 | 3.138008 |
| 241 | 36 | 313.6624574 | -72.66245736 | -2.0184 |
| 296 | 11 | 225.0545472 | 70.94545282 | 6.449587 |
| 273 | 14 | 240.7762745 | 32.22372552 | 2.301695 |
| 267 | 24 | 279.9993274 | -12.99932735 | -0.54164 |
| 268 | 35 | 311.1980685 | -43.19806847 | -1.23423 |
| 284 | 21 | 269.7237834 | 14.27621659 | 0.67982 |
| 278 | 25 | 283.2181247 | -5.218124674 | -0.20872 |
| 279 | 31 | 300.8008884 | -21.80088843 | -0.70325 |
| 283 | 29 | 295.2359776 | -12.23597764 | -0.42193 |
| 197 | 8 | 205.8557663 | -8.855766313 | -1.10697 |
| 191 | 6 | 189.9241496 | 1.075850414 | 0.179308 |
| 168 | 5 | 180.4718381 | -12.47183807 | -2.49437 |
| 231 | 28 | 292.3493208 | -61.34932075 | -2.19105 |
| 352 | 21 | 269.7237834 | 82.27621659 | 3.917915 |
| 360 | 28 | 292.3493208 | 67.65067925 | 2.416096 |
| 370 | 18 | 258.3295823 | 111.6704177 | 6.203912 |
| 390 | 38 | 318.4470627 | 71.55293728 | 1.882972 |
| 395 | 40 | 323.0536393 | 71.94636066 | 1.798659 |
| 399 | 45 | 333.8853349 | 65.11466505 | 1.446993 |
| 400 | 50 | 343.8819981 | 56.11800185 | 1.12236 |
| 395 | 40 | 323.0536393 | 71.94636066 | 1.798659 |
| 223 | 9 | 212.7579235 | 10.2420765 | 1.138008 |
| 226 | 12 | 230.6049309 | -4.60493085 | -0.38374 |
| 241 | 22 | 273.2600799 | -32.2600799 | -1.46637 |
| 273 | 17 | 254.2280922 | 18.77190784 | 1.10423 |
| 267 | 21 | 269.7237834 | -2.723783405 | -0.1297 |
| 284 | 32 | 303.4868195 | -19.48681948 | -0.60896 |
| 278 | 32 | 303.4868195 | -25.48681948 | -0.79646 |
| 279 | 36 | 313.6624574 | -34.66245736 | -0.96285 |
| 291 | 40 | 323.0536393 | -32.05363934 | -0.80134 |
| 284 | 9 | 212.7579235 | 71.2420765 | 7.915786 |
| 278 | 6 | 189.9241496 | 88.07585041 | 14.67931 |
| 279 | 5 | 180.4718381 | 98.52816193 | 19.70563 |
| 291 | 7 | 198.3011768 | 92.69882317 | 13.24269 |
| 300 | 23 | 276.6824639 | 23.31753613 | 1.013806 |
| 310 | 28 | 292.3493208 | 17.65067925 | 0.630381 |
| 315 | 28 | 292.3493208 | 22.65067925 | 0.808953 |
| 390 | 45 | 333.8853349 | 56.11466505 | 1.246993 |
| 400 | 50 | 343.8819981 | 56.11800185 | 1.12236 |
| 340 | 40 | 323.0536393 | 16.94636066 | 0.423659 |
| 320 | 36 | 313.6624574 | 6.337542645 | 0.176043 |
| 350 | 40 | 323.0536393 | 26.94636066 | 0.673659 |
| 210 | 15 | 245.4728093 | -35.4728093 | -2.36485 |
| 250 | 20 | 266.0640755 | -16.06407546 | -0.8032 |
| 280 | 28 | 292.3493208 | -12.34932075 | -0.44105 |
| 220 | 13 | 235.83159 | -15.83158997 | -1.21781 |
| 260 | 24 | 279.9993274 | -19.99932735 | -0.83331 |
| 279 | 36 | 313.6624574 | -34.66245736 | -0.96285 |
| 290 | 37 | 316.0780396 | -26.07803961 | -0.70481 |
| 340 | 38 | 318.4470627 | 21.55293728 | 0.567183 |
| 360 | 41 | 325.2949493 | 34.70505071 | 0.846465 |
| 200 | 4 | 169.54096 | 30.45904001 | 7.61476 |
| 210 | 6 | 189.9241496 | 20.07585041 | 3.345975 |
| 220 | 9 | 212.7579235 | 7.242076497 | 0.804675 |
| 230 | 12 | 230.6049309 | -0.60493085 | -0.05041 |
| 240 | 18 | 258.3295823 | -18.32958233 | -1.01831 |
| 245 | 24 | 279.9993274 | -34.99932735 | -1.45831 |
| 246 | 24 | 279.9993274 | -33.99932735 | -1.41664 |
| 250 | 30 | 298.0518293 | -48.05182931 | -1.60173 |
| 270 | 34 | 308.682449 | -38.68244897 | -1.13772 |
| 290 | 37 | 316.0780396 | -26.07803961 | -0.70481 |
| 300 | 45 | 333.8853349 | -33.88533495 | -0.75301 |
| 350 | 50 | 343.8819981 | 6.118001853 | 0.12236 |
| 230 | 8 | 205.8557663 | 24.14423369 | 3.018029 |
| 260 | 13 | 235.83159 | 24.16841003 | 1.859108 |
| 270 | 14 | 240.7762745 | 29.22372552 | 2.087409 |
| 300 | 15 | 245.4728093 | 54.5271907 | 3.635146 |
| 309 | 18 | 258.3295823 | 50.67041767 | 2.815023 |
| 320 | 22 | 273.2600799 | 46.7399201 | 2.124542 |
| 330 | 26 | 286.3455101 | 43.65448988 | 1.679019 |
| 380 | 38 | 318.4470627 | 61.55293728 | 1.619814 |
| 390 | 45 | 333.8853349 | 56.11466505 | 1.246993 |
| 345 | 30 | 298.0518293 | 46.94817069 | 1.564939 |
| 260 | 14 | 240.7762745 | 19.22372552 | 1.373123 |
| 370 | 32 | 303.4868195 | 66.51318052 | 2.078537 |
| 340 | 30 | 298.0518293 | 41.94817069 | 1.398272 |
| 440 | 50 | 343.8819981 | 96.11800185 | 1.92236 |
| 440 | 50 | 343.8819981 | 96.11800185 | 1.92236 |
| 435 | 50 | 343.8819981 | 91.11800185 | 1.82236 |
| 240 | 11 | 225.0545472 | 14.94545282 | 1.358678 |
| 220 | 9 | 212.7579235 | 7.242076497 | 0.804675 |
| 320 | 35 | 311.1980685 | 8.801931526 | 0.251484 |
| 250 | 18 | 258.3295823 | -8.329582332 | -0.46275 |
| 310 | 30 | 298.0518293 | 11.94817069 | 0.398272 |
| 310 | 30 | 298.0518293 | 11.94817069 | 0.398272 |
| 340 | 40 | 323.0536393 | 16.94636066 | 0.423659 |
| 260 | 14 | 240.7762745 | 19.22372552 | 1.373123 |
| 220 | 11 | 225.0545472 | -5.054547183 | -0.4595 |
| 310 | 26 | 286.3455101 | 23.65448988 | 0.909788 |
| 330 | 33 | 306.1129788 | 23.8870212 | 0.723849 |
| 315 | 30 | 298.0518293 | 16.94817069 | 0.564939 |
| 345 | 40 | 323.0536393 | 21.94636066 | 0.548659 |
| 335 | 35 | 311.1980685 | 23.80193153 | 0.680055 |
| 315 | 18 | 258.3295823 | 56.67041767 | 3.148357 |
| 290 | 12 | 230.6049309 | 59.39506915 | 4.949589 |
| 320 | 18 | 258.3295823 | 61.67041767 | 3.426134 |
| 290 | 20 | 266.0640755 | 23.93592454 | 1.196796 |
| 300 | 30 | 298.0518293 | 1.948170694 | 0.064939 |
| 295 | 25 | 283.2181247 | 11.78187533 | 0.471275 |
| 250 | 16 | 249.9490184 | 0.050981619 | 0.003186 |
| 191 | 14 | 240.7762745 | -49.77627448 | -3.55545 |
| 225 | 20 | 266.0640755 | -41.06407546 | -2.0532 |
| 330 | 30 | 298.0518293 | 31.94817069 | 1.064939 |
| 225 | 18 | 258.3295823 | -33.32958233 | -1.85164 |
| 270 | 30 | 298.0518293 | -28.05182931 | -0.93506 |
| 240 | 14 | 240.7762745 | -0.776274476 | -0.05545 |
| 270 | 30 | 298.0518293 | -28.05182931 | -0.93506 |
| 230 | 24 | 279.9993274 | -49.99932735 | -2.08331 |
| 210 | 19 | 262.2701403 | -52.27014033 | -2.75106 |
| 340 | 30 | 298.0518293 | 41.94817069 | 1.398272 |
| 270 | 30 | 298.0518293 | -28.05182931 | -0.93506 |
| 220 | 21 | 269.7237834 | -49.72378341 | -2.3678 |
| 221 | 21 | 269.7237834 | -48.72378341 | -2.32018 |
| 210 | 16 | 249.9490184 | -39.94901838 | -2.49681 |
| 200 | 13 | 235.83159 | -35.83158997 | -2.75628 |
| 280 | 50 | 343.8819981 | -63.88199815 | -1.27764 |
| 280 | 50 | 343.8819981 | -63.88199815 | -1.27764 |
| 215 | 16 | 249.9490184 | -34.94901838 | -2.18431 |
| 230 | 28 | 292.3493208 | -62.34932075 | -2.22676 |
| 223 | 24 | 279.9993274 | -56.99932735 | -2.37497 |
| 230 | 27 | 289.3874509 | -59.38745092 | -2.19954 |
| 250 | 30 | 298.0518293 | -48.05182931 | -1.60173 |
| 241 | 24 | 279.9993274 | -38.99932735 | -1.62497 |
| 290 | 30 | 298.0518293 | -8.051829306 | -0.26839 |
| 290 | 30 | 298.0518293 | -8.051829306 | -0.26839 |
| 290 | 30 | 298.0518293 | -8.051829306 | -0.26839 |
| 215 | 21 | 269.7237834 | -54.72378341 | -2.60589 |
| 284 | 19 | 262.2701403 | 21.72985967 | 1.143677 |
| 296 | 30 | 298.0518293 | -2.051829306 | -0.06839 |
| 250 | 27 | 289.3874509 | -39.38745092 | -1.45879 |
| 230 | 19 | 262.2701403 | -32.27014033 | -1.69843 |
| 220 | 18 | 258.3295823 | -38.32958233 | -2.12942 |
| 210 | 13 | 235.83159 | -25.83158997 | -1.98705 |
| 265 | 30 | 298.0518293 | -33.05182931 | -1.10173 |
| 265 | 30 | 298.0518293 | -33.05182931 | -1.10173 |
| 230 | 24 | 279.9993274 | -49.99932735 | -2.08331 |
| 190 | 14 | 240.7762745 | -50.77627448 | -3.62688 |
| 250 | 27 | 289.3874509 | -39.38745092 | -1.45879 |
| 200 | 16 | 249.9490184 | -49.94901838 | -3.12181 |
| 260 | 30 | 298.0518293 | -38.05182931 | -1.26839 |
| 257 | 25 | 283.2181247 | -26.21812467 | -1.04872 |
| 228 | 24 | 279.9993274 | -51.99932735 | -2.16664 |
| 225 | 23 | 276.6824639 | -51.68246387 | -2.24706 |
| 290 | 20 | 266.0640755 | 23.93592454 | 1.196796 |
| 290 | 20 | 266.0640755 | 23.93592454 | 1.196796 |
| 280 | 17 | 254.2280922 | 25.77190784 | 1.515995 |
| 185 | 13 | 235.83159 | -50.83158997 | -3.91012 |
| 250 | 23 | 276.6824639 | -26.68246387 | -1.16011 |
| 295 | 20 | 266.0640755 | 28.93592454 | 1.446796 |
| 300 | 30 | 298.0518293 | 1.948170694 | 0.064939 |
| 300 | 30 | 298.0518293 | 1.948170694 | 0.064939 |
| 298 | 28 | 292.3493208 | 5.650679248 | 0.20181 |
| 240 | 22 | 273.2600799 | -33.2600799 | -1.51182 |
| 245 | 20 | 266.0640755 | -21.06407546 | -1.0532 |
| 250 | 23 | 276.6824639 | -26.68246387 | -1.16011 |
| 220 | 17 | 254.2280922 | -34.22809216 | -2.01342 |
| 280 | 27 | 289.3874509 | -9.387450918 | -0.34768 |
| 300 | 30 | 298.0518293 | 1.948170694 | 0.064939 |
| 300 | 30 | 298.0518293 | 1.948170694 | 0.064939 |
| 200 | 13 | 235.83159 | -35.83158997 | -2.75628 |
| 205 | 16 | 249.9490184 | -44.94901838 | -2.80931 |
| 305 | 30 | 298.0518293 | 6.948170694 | 0.231606 |
| 289 | 24 | 279.9993274 | 9.000672646 | 0.375028 |
| 270 | 17 | 254.2280922 | 15.77190784 | 0.927759 |
| 285 | 19 | 262.2701403 | 22.72985967 | 1.196308 |
| 280 | 23 | 276.6824639 | 3.317536128 | 0.144241 |
| 312 | 30 | 298.0518293 | 13.94817069 | 0.464939 |
| 312 | 30 | 298.0518293 | 13.94817069 | 0.464939 |
| 260 | 15 | 245.4728093 | 14.5271907 | 0.968479 |
| 265 | 16 | 249.9490184 | 15.05098162 | 0.940686 |
| 270 | 20 | 266.0640755 | 3.935924541 | 0.196796 |
| 315 | 30 | 298.0518293 | 16.94817069 | 0.564939 |
| 315 | 30 | 298.0518293 | 16.94817069 | 0.564939 |
| 315 | 30 | 298.0518293 | 16.94817069 | 0.564939 |
| 228 | 14 | 240.7762745 | -12.77627448 | -0.91259 |
| 197 | 8 | 205.8557663 | -8.855766313 | -1.10697 |
| 290 | 20 | 266.0640755 | 23.93592454 | 1.196796 |
| 290 | 20 | 266.0640755 | 23.93592454 | 1.196796 |
| 199 | 10 | 219.1279826 | -20.12798257 | -2.0128 |
| 230 | 15 | 245.4728093 | -15.4728093 | -1.03152 |
| 225 | 12 | 230.6049309 | -5.60493085 | -0.46708 |
| 200 | 9 | 212.7579235 | -12.7579235 | -1.41755 |
| 230 | 15 | 245.4728093 | -15.4728093 | -1.03152 |
| 245 | 20 | 266.0640755 | -21.06407546 | -1.0532 |
| 243 | 20 | 266.0640755 | -23.06407546 | -1.1532 |
| 262 | 23 | 276.6824639 | -14.68246387 | -0.63837 |
| 350 | 45 | 333.8853349 | 16.11466505 | 0.358104 |
| 270 | 26 | 286.3455101 | -16.34551012 | -0.62867 |
| 300 | 30 | 298.0518293 | 1.948170694 | 0.064939 |
| 380 | 50 | 343.8819981 | 36.11800185 | 0.72236 |
| 191 | 5 | 180.4718381 | 10.52816193 | 2.105632 |
| 197 | 12 | 230.6049309 | -33.60493085 | -2.80041 |
| 195 | 11 | 225.0545472 | -30.05454718 | -2.73223 |
| 340 | 49 | 341.9422325 | -1.942232451 | -0.03964 |
| 295 | 27 | 289.3874509 | 5.612549082 | 0.207872 |
| 220 | 17 | 254.2280922 | -34.22809216 | -2.01342 |
| 220 | 17 | 254.2280922 | -34.22809216 | -2.01342 |
| 230 | 22 | 273.2600799 | -43.2600799 | -1.96637 |
| 201 | 13 | 235.83159 | -34.83158997 | -2.67935 |
| 198 | 12 | 230.6049309 | -32.60493085 | -2.71708 |
| 230 | 19 | 262.2701403 | -32.27014033 | -1.69843 |


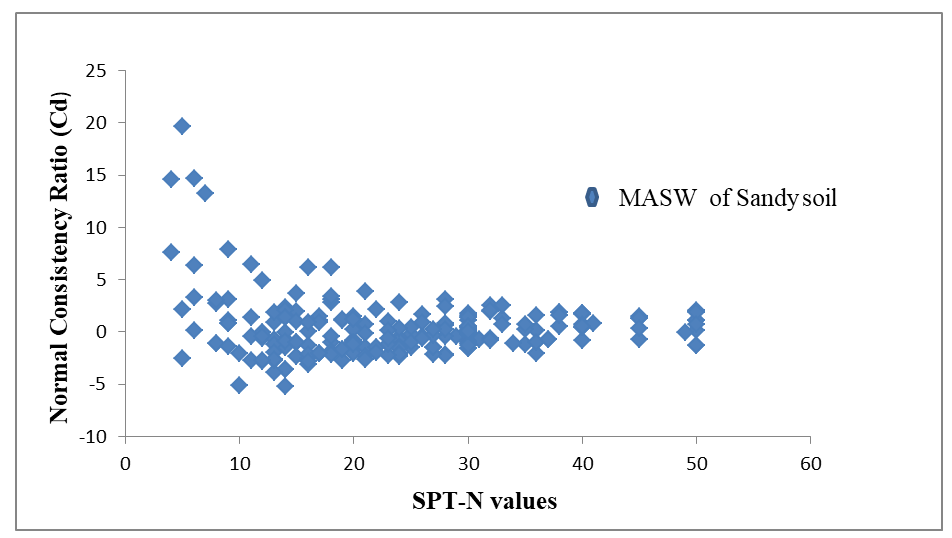


Figure S3: Cd and SPT-N value graphs of sandy soil in the study area of Hawassa town, Southern Ethiopia

Table S5: Measured Vs, predicted Vs and Residuals data sets used for the comparison of predicted and measured Vs in the Hawassa town

| **Vsmeas (m/s)** | **Vspred (m/s)** | **Residuals (Vsmeas -Vspred)** |
| --- | --- | --- |
| 168 | 240.7762745 | -72.77627448 |
| 231 | 266.0640755 | -35.06407546 |
| 310 | 298.0518293 | 11.94817069 |
| 449 | 343.8819981 | 105.1180019 |
| 300 | 298.0518293 | 1.948170694 |
| 220 | 240.7762745 | -20.77627448 |
| 238 | 269.7237834 | -31.72378341 |
| 168 | 219.1279826 | -51.12798257 |
| 231 | 240.7762745 | -9.776274476 |
| 352 | 298.0518293 | 53.94817069 |
| 400 | 343.8819981 | 56.11800185 |
| 293 | 298.0518293 | -5.051829306 |
| 230 | 245.4728093 | -15.4728093 |
| 250 | 266.0640755 | -16.06407546 |
| 230 | 230.6049309 | -0.60493085 |
| 228 | 169.54096 | 58.45904001 |
| 247 | 283.2181247 | -36.21812467 |
| 275 | 298.0518293 | -23.05182931 |
| 348 | 306.1129788 | 41.8870212 |
| 390 | 323.0536393 | 66.94636066 |
| 230 | 240.7762745 | -10.77627448 |
| 228 | 205.8557663 | 22.14423369 |
| 247 | 266.0640755 | -19.06407546 |
| 275 | 286.3455101 | -11.34551012 |
| 348 | 279.9993274 | 68.00067265 |
| 380 | 292.3493208 | 87.65067925 |
| 385 | 303.4868195 | 81.51318052 |
| 390 | 306.1129788 | 83.8870212 |
| 395 | 323.0536393 | 71.94636066 |
| 230 | 249.9490184 | -19.94901838 |
| 228 | 189.9241496 | 38.07585041 |
| 247 | 235.83159 | 11.16841003 |
| 275 | 245.4728093 | 29.5271907 |
| 348 | 249.9490184 | 98.05098162 |
| 365 | 303.4868195 | 61.51318052 |
| 370 | 313.6624574 | 56.33754264 |
| 390 | 318.4470627 | 71.55293728 |
| 395 | 323.0536393 | 71.94636066 |
| 223 | 230.6049309 | -7.60493085 |
| 226 | 235.83159 | -9.831589966 |
| 241 | 212.7579235 | 28.2420765 |
| 241 | 313.6624574 | -72.66245736 |
| 296 | 225.0545472 | 70.94545282 |
| 273 | 240.7762745 | 32.22372552 |
| 267 | 279.9993274 | -12.99932735 |
| 268 | 311.1980685 | -43.19806847 |
| 284 | 269.7237834 | 14.27621659 |
| 278 | 283.2181247 | -5.218124674 |
| 279 | 300.8008884 | -21.80088843 |
| 283 | 295.2359776 | -12.23597764 |
| 197 | 205.8557663 | -8.855766313 |
| 191 | 189.9241496 | 1.075850414 |
| 168 | 180.4718381 | -12.47183807 |
| 231 | 292.3493208 | -61.34932075 |
| 352 | 269.7237834 | 82.27621659 |
| 360 | 292.3493208 | 67.65067925 |
| 370 | 258.3295823 | 111.6704177 |
| 390 | 318.4470627 | 71.55293728 |
| 395 | 323.0536393 | 71.94636066 |
| 399 | 333.8853349 | 65.11466505 |
| 400 | 343.8819981 | 56.11800185 |
| 395 | 323.0536393 | 71.94636066 |
| 223 | 212.7579235 | 10.2420765 |
| 226 | 230.6049309 | -4.60493085 |
| 241 | 273.2600799 | -32.2600799 |
| 273 | 254.2280922 | 18.77190784 |
| 267 | 269.7237834 | -2.723783405 |
| 284 | 303.4868195 | -19.48681948 |
| 278 | 303.4868195 | -25.48681948 |
| 279 | 313.6624574 | -34.66245736 |
| 291 | 323.0536393 | -32.05363934 |
| 284 | 212.7579235 | 71.2420765 |
| 278 | 189.9241496 | 88.07585041 |
| 279 | 180.4718381 | 98.52816193 |
| 291 | 198.3011768 | 92.69882317 |
| 300 | 276.6824639 | 23.31753613 |
| 310 | 292.3493208 | 17.65067925 |
| 315 | 292.3493208 | 22.65067925 |
| 390 | 333.8853349 | 56.11466505 |
| 400 | 343.8819981 | 56.11800185 |
| 340 | 323.0536393 | 16.94636066 |
| 320 | 313.6624574 | 6.337542645 |
| 350 | 323.0536393 | 26.94636066 |
| 210 | 245.4728093 | -35.4728093 |
| 250 | 266.0640755 | -16.06407546 |
| 280 | 292.3493208 | -12.34932075 |
| 220 | 235.83159 | -15.83158997 |
| 260 | 279.9993274 | -19.99932735 |
| 279 | 313.6624574 | -34.66245736 |
| 290 | 316.0780396 | -26.07803961 |
| 340 | 318.4470627 | 21.55293728 |
| 360 | 325.2949493 | 34.70505071 |
| 200 | 169.54096 | 30.45904001 |
| 210 | 189.9241496 | 20.07585041 |
| 220 | 212.7579235 | 7.242076497 |
| 230 | 230.6049309 | -0.60493085 |
| 240 | 258.3295823 | -18.32958233 |
| 245 | 279.9993274 | -34.99932735 |
| 246 | 279.9993274 | -33.99932735 |
| 250 | 298.0518293 | -48.05182931 |
| 270 | 308.682449 | -38.68244897 |
| 290 | 316.0780396 | -26.07803961 |
| 300 | 333.8853349 | -33.88533495 |
| 350 | 343.8819981 | 6.118001853 |
| 230 | 205.8557663 | 24.14423369 |
| 260 | 235.83159 | 24.16841003 |
| 270 | 240.7762745 | 29.22372552 |
| 300 | 245.4728093 | 54.5271907 |
| 309 | 258.3295823 | 50.67041767 |
| 320 | 273.2600799 | 46.7399201 |
| 330 | 286.3455101 | 43.65448988 |
| 380 | 318.4470627 | 61.55293728 |
| 390 | 333.8853349 | 56.11466505 |
| 345 | 298.0518293 | 46.94817069 |
| 260 | 240.7762745 | 19.22372552 |
| 370 | 303.4868195 | 66.51318052 |
| 340 | 298.0518293 | 41.94817069 |
| 440 | 343.8819981 | 96.11800185 |
| 440 | 343.8819981 | 96.11800185 |
| 435 | 343.8819981 | 91.11800185 |
| 240 | 225.0545472 | 14.94545282 |
| 220 | 212.7579235 | 7.242076497 |
| 320 | 311.1980685 | 8.801931526 |
| 250 | 258.3295823 | -8.329582332 |
| 310 | 298.0518293 | 11.94817069 |
| 310 | 298.0518293 | 11.94817069 |
| 340 | 323.0536393 | 16.94636066 |
| 260 | 240.7762745 | 19.22372552 |
| 220 | 225.0545472 | -5.054547183 |
| 310 | 286.3455101 | 23.65448988 |
| 330 | 306.1129788 | 23.8870212 |
| 315 | 298.0518293 | 16.94817069 |
| 345 | 323.0536393 | 21.94636066 |
| 335 | 311.1980685 | 23.80193153 |
| 315 | 258.3295823 | 56.67041767 |
| 290 | 230.6049309 | 59.39506915 |
| 320 | 258.3295823 | 61.67041767 |
| 290 | 266.0640755 | 23.93592454 |
| 300 | 298.0518293 | 1.948170694 |
| 295 | 283.2181247 | 11.78187533 |
| 250 | 249.9490184 | 0.050981619 |
| 191 | 240.7762745 | -49.77627448 |
| 225 | 266.0640755 | -41.06407546 |
| 330 | 298.0518293 | 31.94817069 |
| 225 | 258.3295823 | -33.32958233 |
| 270 | 298.0518293 | -28.05182931 |
| 240 | 240.7762745 | -0.776274476 |
| 270 | 298.0518293 | -28.05182931 |
| 230 | 279.9993274 | -49.99932735 |
| 210 | 262.2701403 | -52.27014033 |
| 340 | 298.0518293 | 41.94817069 |
| 270 | 298.0518293 | -28.05182931 |
| 220 | 269.7237834 | -49.72378341 |
| 221 | 269.7237834 | -48.72378341 |
| 210 | 249.9490184 | -39.94901838 |
| 200 | 235.83159 | -35.83158997 |
| 280 | 343.8819981 | -63.88199815 |
| 280 | 343.8819981 | -63.88199815 |
| 215 | 249.9490184 | -34.94901838 |
| 230 | 292.3493208 | -62.34932075 |
| 223 | 279.9993274 | -56.99932735 |
| 230 | 289.3874509 | -59.38745092 |
| 250 | 298.0518293 | -48.05182931 |
| 241 | 279.9993274 | -38.99932735 |
| 290 | 298.0518293 | -8.051829306 |
| 290 | 298.0518293 | -8.051829306 |
| 290 | 298.0518293 | -8.051829306 |
| 215 | 269.7237834 | -54.72378341 |
| 284 | 262.2701403 | 21.72985967 |
| 296 | 298.0518293 | -2.051829306 |
| 250 | 289.3874509 | -39.38745092 |
| 230 | 262.2701403 | -32.27014033 |
| 220 | 258.3295823 | -38.32958233 |
| 210 | 235.83159 | -25.83158997 |
| 265 | 298.0518293 | -33.05182931 |
| 265 | 298.0518293 | -33.05182931 |
| 230 | 279.9993274 | -49.99932735 |
| 190 | 240.7762745 | -50.77627448 |
| 250 | 289.3874509 | -39.38745092 |
| 200 | 249.9490184 | -49.94901838 |
| 260 | 298.0518293 | -38.05182931 |
| 257 | 283.2181247 | -26.21812467 |
| 228 | 279.9993274 | -51.99932735 |
| 225 | 276.6824639 | -51.68246387 |
| 290 | 266.0640755 | 23.93592454 |
| 290 | 266.0640755 | 23.93592454 |
| 280 | 254.2280922 | 25.77190784 |
| 185 | 235.83159 | -50.83158997 |
| 250 | 276.6824639 | -26.68246387 |
| 295 | 266.0640755 | 28.93592454 |
| 300 | 298.0518293 | 1.948170694 |
| 300 | 298.0518293 | 1.948170694 |
| 298 | 292.3493208 | 5.650679248 |
| 240 | 273.2600799 | -33.2600799 |
| 245 | 266.0640755 | -21.06407546 |
| 250 | 276.6824639 | -26.68246387 |
| 220 | 254.2280922 | -34.22809216 |
| 280 | 289.3874509 | -9.387450918 |
| 300 | 298.0518293 | 1.948170694 |
| 300 | 298.0518293 | 1.948170694 |
| 200 | 235.83159 | -35.83158997 |
| 205 | 249.9490184 | -44.94901838 |
| 305 | 298.0518293 | 6.948170694 |
| 289 | 279.9993274 | 9.000672646 |
| 270 | 254.2280922 | 15.77190784 |
| 285 | 262.2701403 | 22.72985967 |
| 280 | 276.6824639 | 3.317536128 |
| 312 | 298.0518293 | 13.94817069 |
| 312 | 298.0518293 | 13.94817069 |
| 260 | 245.4728093 | 14.5271907 |
| 265 | 249.9490184 | 15.05098162 |
| 270 | 266.0640755 | 3.935924541 |
| 315 | 298.0518293 | 16.94817069 |
| 315 | 298.0518293 | 16.94817069 |
| 315 | 298.0518293 | 16.94817069 |
| 228 | 240.7762745 | -12.77627448 |
| 197 | 205.8557663 | -8.855766313 |
| 290 | 266.0640755 | 23.93592454 |
| 290 | 266.0640755 | 23.93592454 |
| 199 | 219.1279826 | -20.12798257 |
| 230 | 245.4728093 | -15.4728093 |
| 225 | 230.6049309 | -5.60493085 |
| 200 | 212.7579235 | -12.7579235 |
| 230 | 245.4728093 | -15.4728093 |
| 245 | 266.0640755 | -21.06407546 |
| 243 | 266.0640755 | -23.06407546 |
| 262 | 276.6824639 | -14.68246387 |
| 350 | 333.8853349 | 16.11466505 |
| 270 | 286.3455101 | -16.34551012 |
| 300 | 298.0518293 | 1.948170694 |
| 380 | 343.8819981 | 36.11800185 |
| 191 | 180.4718381 | 10.52816193 |
| 197 | 230.6049309 | -33.60493085 |
| 195 | 225.0545472 | -30.05454718 |
| 340 | 341.9422325 | -1.942232451 |
| 295 | 289.3874509 | 5.612549082 |
| 220 | 254.2280922 | -34.22809216 |
| 220 | 254.2280922 | -34.22809216 |
| 230 | 273.2600799 | -43.2600799 |
| 201 | 235.83159 | -34.83158997 |
| 198 | 230.6049309 | -32.60493085 |
| 230 | 262.2701403 | -32.27014033 |

**
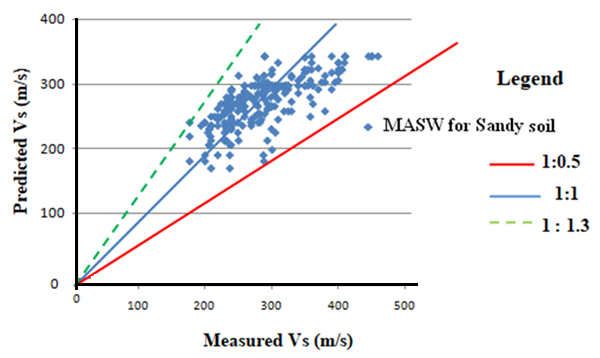
**

Figure S4: Comparison between predicted and measured Vs data of sandy soil used for the validation in Hawassa town, Southern Ethiopia
